# Supplementary material for: Creating SERS hot spots on ultralong single-crystal β-AgVO3 microribbons
Source: Royal Society of Chemistry journal article supplement (doi:10.1039/c4tc00078a), 2014-01-01
Supplement: c4tc00078a1.pdf [file c4tc00078a1.pdf]

*Supporting Information*

**Creating SERS Hot Spots on Ultralong Single-Crystal  $\beta$ -Ag  
 $\text{VO}_3$  Microribbons**

*Seung-Ho Jang, Jun Hee Yoon, Young-Duk Huh, and Sangwoon Yoon\**

Department of Chemistry, Dankook University

152 Jukjeon-ro, Suji-gu, Yongin, Gyeonggi 448-701, Korea

\* E-mail: [sangwoon@dankook.ac.kr](mailto:sangwoon@dankook.ac.kr)

## 1. Calculation of SERS Enhancement Factor

The enhancement factor (EF) in SERS is calculated by the following equation:

$$EF = \frac{I_{sample} / (N_{sample} \cdot \rho_{sample})}{I_{ref} / (N_{ref} \cdot \rho_{ref})},$$

where  $I$ ,  $N$ , and  $\rho$  represent the measured Raman intensity, the number of molecules probed, and the laser power density ( $\text{W}/\text{m}^2$ ) used for Raman excitation, respectively. The “sample” is the 4-ATP molecules on the  $\beta\text{-AgVO}_3$  microribbons; the “reference” is the same molecule in solution for which normal (unenhanced) Raman spectrum is obtained.

For the Raman intensities ( $I_{sample}$  and  $I_{ref}$ ), we measured the peak intensities of the  $1078\text{ cm}^{-1}$  C–S stretching mode of 4-ATP from the SERS spectrum of the  $\beta\text{-AgVO}_3$  microribbons and the normal Raman spectrum of 4-ATP in 0.5 M solution. We obtained  $I_{sample} = 852$  and  $I_{ref} = 3.6$ .

SERS signal arises from the 4-ATP molecules adsorbed on the AgNPs formed on the  $\beta\text{-AgVO}_3$  microribbon surfaces. We estimated the number of 4-ATP molecules that contribute to SERS simply by considering the molecules in the laser probe area. For the conservative estimation of the SERS enhancement factor, we assumed that 4-ATP molecules form a monolayer in the probed region with an occupation area of  $0.22\text{ nm}^2$  per molecule.<sup>1</sup> The laser spot in the Raman microscope through a  $50\times$  objective was  $4.5\text{ }\mu\text{m}$ . Therefore, the number of molecules in the probed area corresponds to  $7.2 \times 10^7$ . Calculation of the number of molecules probed in the solution is a little more complicated. The probe volume for the 0.5 M 4-ATP solution was assumed to be a cylinder. The diameter of the cylinder corresponds to the focal size of laser ( $785\text{ nm}$ ) at the sample through a  $10\times$  objective which we used for solution. The length of the cylinder is the confocal parameter. The beam diameter through a  $10\times$  objective measured  $19\text{ }\mu\text{m}$ . Since the laser beam through an objective still obeys the Gaussian optics, the confocal parameter ( $b$ ) is calculated by

$$b = \frac{2 \cdot \pi \cdot w_0^2}{\lambda},$$

where  $w_0$  is the beam waist at the focus ( $9.5 \mu\text{m}$ ) and  $\lambda$  is the wavelength of light ( $785 \text{ nm}$ ).<sup>2</sup> As a result, the calculated cylinder volume was  $2.0 \times 10^{-13} \text{ m}^3$ . Using the equation above, we obtained the number of molecules probed in 0.5 M solution,  $6.2 \times 10^{13}$ .

The laser power at the sample through 50 $\times$  and 10 $\times$  objectives was both 12.0 mW. From these, the enhancement factor is  $1.1 \times 10^7$ .

## 2. Comparison of the $\beta\text{-AgVO}_3$ Microribbons Treated with 4-ATP and Thiophenol

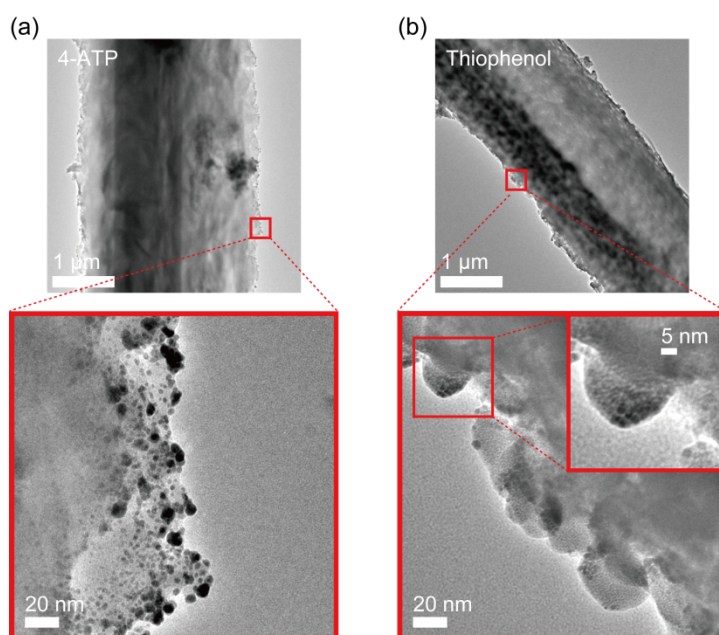

**Figure S2.** TEM images of  $\beta\text{-AgVO}_3$  microribbons treated with (a) 4-ATP and (b) thiophenol.

### References

- (1) N. Mohri, M. Inoue, Y. Arai and K. Yoshikawa, *Langmuir*, 1995, **11**, 1612-1616.
- (2) A. E. Siegman, *Lasers*, University Science Books, Palo Alto, California, U.S.A., 1986.
